# Supplementary material
Source: PubMed Central journal article supplement (PMC2927054)
Supplement: mt2010101x2.pdf [file mt2010101x2.pdf]

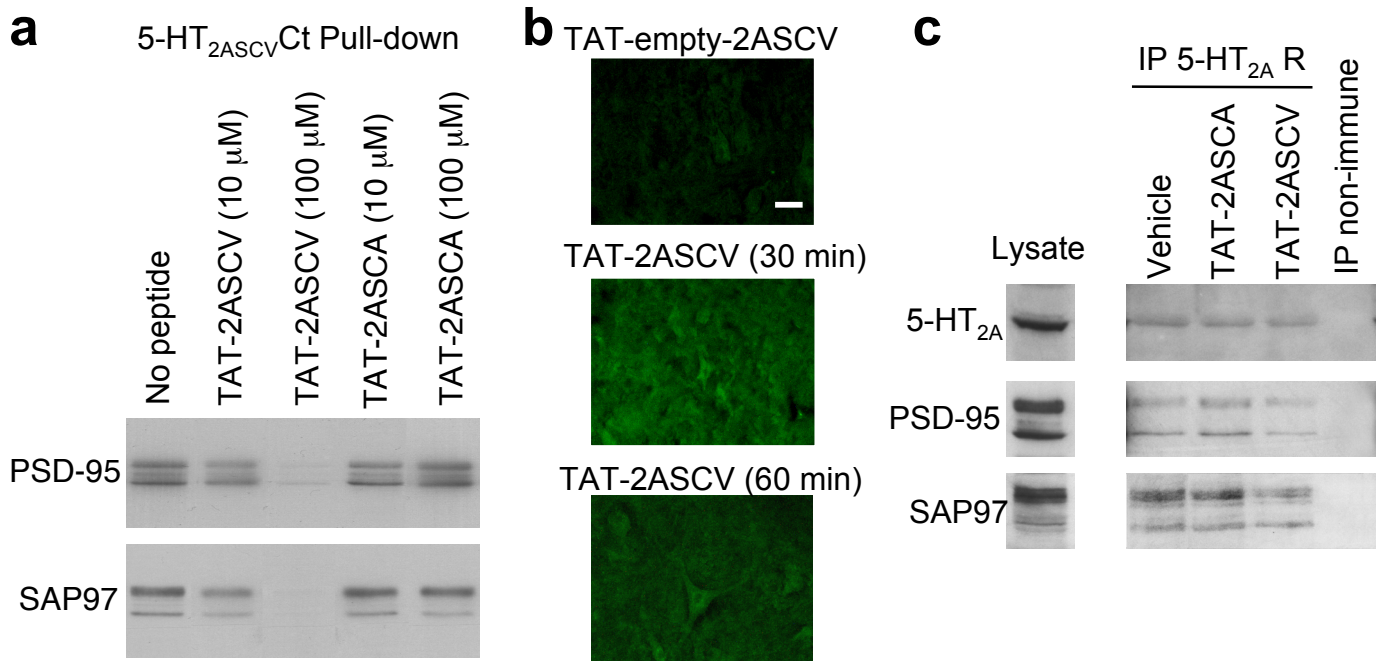

Figure S2

**Figure S2.** Inhibition of 5-HT<sub>2A</sub> receptor/PDZ protein interactions by a cell penetrating peptidyl mimetic of the 5-HT<sub>2A</sub> receptor C-terminus

(a) Spinal cord extracts were incubated with the 5-HT<sub>2ASCVCt</sub> peptide immobilized on activated CH-sepharose beads in the absence or presence of the TAT-2ASCV or the TAT-2ASCA control peptide (10-100 μM). PSD-95 and SAP97 retained by affinity were detected by Western blotting. (b) Visualization of intraneuronal accumulation in the spinal cord of TAT-2ASCV peptide (30 ng/rat) and of the corresponding peptide lacking the Tat protein transduction domain (TAT-empty-2ASCV, 30 ng/rat), labelled N-terminally with MTS-4-fluorescein, 30 and 60 min after intrathecal injection. Scare bar, 50 μm. (c) Rats were injected with either vehicle (NaCl, 10 μl/rat i.t.), the TAT-2ASCV peptide or the TAT-2ASCA peptide (30 ng/rat i.t., each). Rats were sacrificed 30 min after injection. Dorsal spinal cord 5-HT<sub>2A</sub> receptors were immunoprecipitated with the polyclonal anti-5-HT<sub>2A</sub> receptor antibody. Immunoprecipitates were probed with the anti-5-HT<sub>2A</sub> receptor, anti-PSD-95 and anti-SAP97 antibodies. Inputs represent 5% of the total protein amount used for immunoprecipitation. The data illustrated in (a) and (c) are representative of three experiments performed independently. Note the decrease in PSD-95 and SAP97 co-immunoprecipitated with 5-HT<sub>2A</sub> receptors in the spinal cord from TAT-2ASCV-treated animals.
