# Supplementary material
Source: PubMed Central journal article supplement (PMC2927054)
Supplement: mt2010101x4.pdf [file mt2010101x4.pdf]

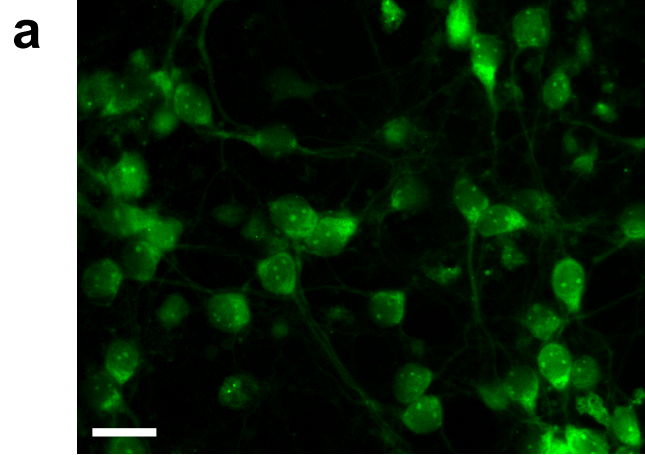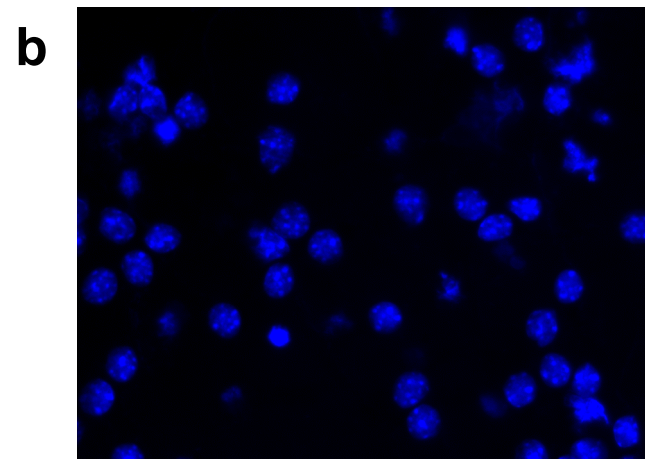

Figure S4

**Figure S4.** Efficient penetration of the TAT-2ASCV peptide in cultured neurons

Cultured cortical neurons were treated for 1 hr with the TAT-2ASCV peptide labeled N-terminally with MTS-4-fluorescein (10  $\mu$ M). **(a)** Fluorescence was visualized in cells fixed 30 min after peptide washout. **(b)** Peptide transduction into all the cultured neurons was assessed by counterstaining cell nuclei with Hoechst 33,258.
